1 **Exposure to perfluoroalkyl substances in a cohort of women firefighters and office**  
2 **workers in San Francisco.**

3

4 Jessica Trowbridge<sup>1,2</sup>, Roy Gerona<sup>3</sup>, Thomas Lin<sup>3</sup>, Ruthann A. Rudel<sup>4</sup>, Vincent  
5 Bessonneau<sup>4</sup>, Heather Buren<sup>5</sup>, Rachel Morello-Frosch<sup>1,2\*</sup>

6

7 <sup>1</sup>Department of Environmental Science, Policy and Management, University of California,  
8 Berkeley, Berkeley, CA

9 <sup>2</sup>School of Public Health, University of California, Berkeley, Berkeley, CA

10 <sup>3</sup>Clinical Toxicology and Environmental Biomonitoring Lab, Department of Obstetrics,  
11 Gynecology and Reproductive Sciences, University of California, San Francisco, San  
12 Francisco, CA

13 <sup>4</sup>Silent Spring Institute, Newton, MA

14 <sup>5</sup>United Fire Service Women, San Francisco, CA

---

15 Acknowledgements: The authors thank all of the WFBC study participants for their  
16 contribution to the study. This work is supported by the California Breast Cancer  
17 Research Program #19BB-2900 (JT, RG, TL, RAR, HB, VB, RMF), the National Institute  
18 of Environmental Health Sciences R01ES027051 (RMF) and the San Francisco  
19 Firefighter Cancer Prevention Foundation (HB). We thank Anthony Stefani, Cassidy  
20 Clarity, Emily O'Rourke, Nancy Carmona, Karen Kerr, Julie Mau, Natasha Parks, Lisa  
21 Holdcroft, San Francisco Fire Chief Jeanine Nicholson, former San Francisco Fire Chief  
22 Joanne Hayes-White, Sharyle Patton, Connie Engel and Nancy Buermeyer for their  
23 contributions to the study.  
24 RAR and VB, are employed at the Silent Spring Institute, a scientific research  
25 organization dedicated to studying environmental factors in women's health. The  
26 Institute is a 501(c)3 public charity funded by federal grants and contracts, foundation  
27 grants, and private donations, including from breast cancer organizations. HB is former  
28 president and member of United Fire Service Women, a 501(c)3 public charity  
29 dedicated to supporting the welfare of women in the San Francisco Fire Department.  
30 The authors declare they have no actual or potential competing financial interests.

31 \*Corresponding author:

32 Rachel Morello-Frosch

33 [rmf@berkeley.edu](mailto:rmf@berkeley.edu)

34 510-643-6358

35 Department of Environmental Science, Policy and Management

36 130 Mulford, Hall #3144, University of California, Berkeley

37 Berkeley CA, 94720

38 **Abstract:**

39 Background: Studies in male firefighters have demonstrated increased exposures to  
40 carcinogenic compounds and increased rates of certain cancers compared to the general  
41 population. Many chemicals related to these occupational exposures have been  
42 associated with breast tumor development in animal and human studies, yet, there have  
43 been no studies on women firefighters due to their low numbers in most fire departments.  
44 To address this data gap, the Women Firefighters Biomonitoring Collaborative (WFBC)  
45 created a biological sample archive and analyzed levels of perfluoroalkyl substances  
46 (PFAS) among women firefighters and office workers in San Francisco.

47 Methods: Active duty women firefighters (n=86) and office workers (n=84) were recruited  
48 from the San Francisco Fire Department and the City and County of San Francisco,  
49 respectively. Serum samples were collected and analyzed using liquid chromatography  
50 tandem mass spectrometry (LC MS/MS) to measure and compare PFAS levels between  
51 firefighters and office workers. For PFAS congeners detected in at least 70% of our study  
52 population, we examined differences in serum PFAS levels controlling for dietary,  
53 demographic and other confounders. Among firefighters, we assessed associations  
54 between occupational activities and PFAS levels.

55 Results: Eight of 12 PFAS congeners were detected at levels above the limit of detection  
56 and seven were detected in at least 70% of the study population. Four PFAS were  
57 detected in all study participants (PFNA, PFOA, PFOS, PFHxS). In regression models  
58 comparing PFAS levels by occupation and adjusting for potential confounders, firefighters  
59 had higher geometric mean (GM) concentrations of PFAS compared to office workers:  
60 2.39 (95%CI = 1.64,3.48), 2.32 (95% CI = 1.17,4.62) and 1.26 (95% CI = 0.99, 1.59) times

61 higher for PFHxS, PFUnDA and PFNA, respectively. In analyses limited to firefighters,  
62 PFAS levels varied by assigned position in the fire department—firefighters and officers  
63 had higher PFNA, PFOA, PFDA, and PFUnDA compared to drivers. Additionally,  
64 firefighters who reported having used firefighting foam had higher concentrations of PFOA  
65 compared firefighters who reported never having used foam.

66 Conclusion: Our study found ubiquitous exposures to PFAS among WFBC participants,  
67 with women firefighters exposed to higher levels of some PFAS compared to office  
68 workers, suggesting that some of these exposures may be occupationally related.

69 **Introduction:**

70 Firefighters have higher rates of some cancers compared to the general population. A  
71 meta-analysis of 32 studies found elevated rates of lymphoma, testicular, and prostate  
72 cancer among male firefighters.<sup>1</sup> Additionally, a review by the International Agency for  
73 Research on Cancer (IARC) found increased cancer rates among firefighters, and  
74 designated the occupation of firefighting as “possibly carcinogenic” or “class 2b”.<sup>2</sup> More  
75 recently, a study of over 19,000 United States firefighters conducted by the National  
76 Institute for Occupational Health and Safety (NIOSH) found that total time spent at fires  
77 was associated with increased lung cancer incidence and mortality, and total number of  
78 fire responses was associated with leukemia mortality.<sup>3</sup> Furthermore, studies in other  
79 countries have found increased rates of several cancers among male firefighters and  
80 other first responders including brain, thyroid, bladder, kidney, prostate, testicular,  
81 breast, digestive cancers, multiple myeloma, and non-Hodgkin’s lymphoma.<sup>4–10</sup> Despite  
82 mounting concern about cancer among male firefighters, few studies have assessed  
83 chemical exposures or cancer risk among women firefighters, many of whom are  
84 concerned about the potential increased risk of breast cancer and other reproductive  
85 cancers. Only two studies have examined the incidence of cancer among women  
86 firefighters. Daniels et al. found that women firefighters had higher incidence and  
87 mortality rates of breast cancer compared to the general US population, though neither  
88 effect estimate was statistically significant.<sup>3</sup> A study of Florida firefighters found that  
89 women firefighters had an increase in overall cancer risk and, in particular, an increased  
90 incidence of Hodgkin’s disease and cervical and thyroid cancers compared to the  
91 general Florida population.<sup>9</sup>

92

93 Occupational exposures may be an important contributor to the increased risk of cancer  
94 among firefighters. Firefighters' exposure to environmental chemicals may arise from  
95 fire suppression activities and during the salvage and overhaul phase of a fire event.<sup>11–</sup>

96 <sup>15</sup> Additionally, hazardous chemicals have been identified in fire station dust, firefighting  
97 foams, diesel emissions, contaminated fire equipment and firefighter protective gear.<sup>16–</sup>

98 <sup>20</sup> Previous studies have shown that firefighters are occupationally exposed to polycyclic  
99 aromatic hydrocarbons,<sup>13,21–24</sup> formaldehyde, dioxins, polybrominated diphenyl ethers  
100 (PBDEs), organophosphate flame retardants,<sup>25,26</sup> and perfluoroalkyl substances  
101 (PFAS),<sup>19,25,27,28</sup> among others.<sup>25,29,30</sup> Many of these chemicals have been associated  
102 with adverse health outcomes including breast cancer and breast tumor development in  
103 both animal and human studies.<sup>31,32</sup>

104

105 PFAS may be of particular relevance to firefighting because these compounds are used  
106 in turnout gear and are a major ingredient of some firefighting foams, such as aqueous  
107 film-forming foams (AFFF).<sup>19,28,33</sup> More generally, PFAS chemicals are frequently  
108 applied to food contact paper, fabrics and furniture to make them stain, water and  
109 grease resistant.<sup>34</sup> PFAS have long half-lives and bioaccumulate in the environment and  
110 human body.<sup>35</sup> Because of their widespread use and persistence, they have been  
111 detected in nearly everyone tested in large biomonitoring studies.<sup>36,37</sup> Biomonitoring  
112 studies within the National Health and Nutrition Examination Survey (NHANES), a  
113 nationally representative sample of the U.S. population, have found that more than 98%  
114 of people tested had multiple congeners of PFAS detected in their bodies.<sup>36</sup>

115

116 PFAS exposure has been linked to multiple adverse health outcomes including cancer,  
117 immune suppression, thyroid and sex hormone disruption, and decreased semen  
118 quality.<sup>38-41</sup> Studies also indicate that exposure is associated with metabolic effects,  
119 ulcerative colitis and adverse effects on liver and kidney function.<sup>42-45</sup>

120

121 Several firefighter biomonitoring studies measured PFAS levels and found higher levels  
122 among firefighters compared to the general population.<sup>25,27,28</sup> These studies, however,  
123 included few or no women. Overall, women remain underrepresented in studies of  
124 firefighters, and very little is known about the extent of their chemical exposures or  
125 occupational health risks for diseases such breast cancer.

126

127 Although women make up 5.1% of firefighters across the United States,<sup>46</sup> their numbers  
128 can be higher in urban jurisdictions, including in San Francisco, which has one of the  
129 highest proportions of women firefighters (15%) in any large urban fire department in  
130 the U.S.<sup>47</sup> As fire departments and other first responder professions diversify and recruit  
131 more women to their ranks, it is important to characterize chemical exposures and  
132 implications for health outcomes of particular relevance to women, such as breast  
133 cancer. To address this data gap, a partnership of firefighters, environmental health  
134 scientists, and environmental health advocates created the Women Firefighters  
135 Biomonitoring Collaborative (WFBC). The WFBC is a community-based, participatory  
136 biomonitoring project that aims to better understand how women firefighters are  
137 exposed to potential breast carcinogens, while also developing a biospecimen archive

138 of women firefighters and office workers in San Francisco. As part of the WFBC, we  
139 conducted a cross-sectional chemical biomonitoring study to compare levels of PFAS in  
140 human serum collected from women firefighters from the San Francisco Fire  
141 Department (SFFD) and non-firefighter women who are office workers for the City and  
142 County of San Francisco. To our knowledge, this is the first biomonitoring study to  
143 measure environmental chemical exposures in an exclusively female cohort of  
144 firefighters and office workers.

145

146 **Methods:**

147 ***Recruitment:***

148 Participant recruitment and sample collection took place between June 2014 and March  
149 2015. Firefighter participants were recruited from the SFFD, via word-of-mouth, emails  
150 through the Department listserv and an article about the study in the “The Mainline,” a  
151 Department newsletter written and edited by both active and retired firefighters.  
152 Similarly, office workers, who were non-first responder employees of the City and  
153 County of San Francisco, were recruited via word-of-mouth, public meetings, health  
154 fairs, and listserv emails targeting employees of the City and County of San Francisco.

155

156 Study inclusion criteria for both firefighters and office workers included being female,  
157 over 18 years old, a full-time employee, and a non-smoker. In addition, firefighters  
158 needed to have at least five years of service with the SFFD and currently be on “active  
159 duty” (i.e. assigned to a fire station) at the time of recruitment. All participants were



160 consented into the study following protocols approved by the Institutional Review Board  
161 of the University of California, Berkeley (# 2013-07-5512).

162

163 ***Exposure assessment interview:***

164 After consent and enrollment into the WFBC study, we conducted an hour-long in-  
165 person exposure assessment interview with each participant. The interview captured  
166 demographic information, basic health information, and possible sources of PFAS  
167 exposure from occupational activities, consumer product use, and dietary factors that  
168 prior literature indicates are potential sources of PFAS exposure.<sup>27,48,49</sup> Food frequency  
169 responses were converted to times per week and categorized into quartiles, tertiles, or  
170 ever/never.

171

172 ***Sample collection and processing***

173 Blood samples were collected by a certified phlebotomist in 40 mL additive-free glass  
174 tubes and transported in a cooler with ice for processing within 3 hours of collection.  
175 Serum was separated by allowing clotting at room temperature, then centrifuging at  
176 3000 rpm for 10 minutes. Serum was aliquoted into 1.2 mL cryo-vial tubes and stored at  
177 -80 °C until analysis per standard protocols.<sup>50</sup> All samples were processed and  
178 analyzed at the University of California, San Francisco.

179

180 ***Laboratory analysis:***

181 Twelve PFAS (perfluorobutanoic acid, PFBA; perfluorobutane sulfonic acid, PFBS;  
182 perfluorohexanoic acid, PFHxA; perfluorohexane sulfonic acid, PFHxS;

183 perfluoroheptanoic acid, PFHpA; perfluorooctanoic acid, PFOA; perfluorooctane  
184 sulfonic acid, PFOS; perfluorooctane sulfonamide, PFOSA; perfluorononanoic acid,  
185 PFNA; perfluorodecanoic acid, PFDA; perfluoroundecanoic acid, PFUnDA;  
186 perfluorododecanoic acid, PFDoA) were analyzed in each serum sample (0.5 mL) using  
187 liquid chromatography- tandem mass spectrometry (LC-MS/MS). An Agilent LC1260  
188 (Sta. Clara, CA)- AB Sciex API 5500 (Foster City, CA) platform was used in the  
189 analysis. Prior to injection into the LC-MS/MS, each sample was prepared for analysis  
190 by solid phase extraction using a Waters Oasis HLB cartridge (10 mg, 1cc). Extracted  
191 aliquots of each sample (25uL) were run in duplicates. The twelve analytes were  
192 separated by elution gradient chromatography using Phenomenex Kinetex C18 column  
193 (100 x 4.6 mm, 2.6 $\mu$ ) at 40°C. An electrospray ionization source operated in the  
194 negative mode was used to ionize each analyte in the mass spectrometer.

195  
196 Analytes were detected in each sample by multiple reaction monitoring using two  
197 transitions per analyte. To determine the presence of each analyte retention matching  
198 (within 0.15 min) along with the peak area ratio between its qualifier and quantifier ions  
199 (within 20%) were used. Quantification of each detected analyte was done by isotope  
200 dilution method using a 10-point calibration curve (0.02-50 ng/mL) and employing two  
201 C13-labelled PFAS isotopologues. The limits of quantification for the twelve analytes  
202 range from 0.05 to 0.1 ng/mL. Analyte identification from total ion chromatograms was  
203 evaluated using AB Sciex Analyst v2.1 software while quantification of each analyte was  
204 processed using AB Sciex MultiQuant v2.02 software. Analysts were blinded to

205 firefighter and office worker status of the serum samples during the analysis. Results  
206 were reported in ng/mL for all 170 study participants.

207

208 ***Statistical analysis:***

209 We examined the distribution of each PFAS congener across the study population and  
210 then separately for firefighters and office workers and calculated summary statistics  
211 including geometric mean (GM), 95% confidence intervals (CI), and percentiles. As is  
212 common with environmental data, PFAS concentrations were non-normally distributed,  
213 thus we used non-parametric methods (Wilcoxon rank-sum test) to test unadjusted  
214 differences in PFAS concentrations between firefighters and office workers. We used  
215 lognormal regression analyses to assess differences in PFAS concentrations between  
216 firefighters and office workers, controlling for potential confounders. We then limited the  
217 analysis to firefighters and used lognormal regression analyses to explore the  
218 association between firefighter occupational activities and PFAS concentrations  
219 controlling for potential confounders. Congeners with at least a 70% detection frequency  
220 were included in the data analysis and we used maximum likelihood estimation (MLE)  
221 with the NADA R package to account for left censored data (data below the limit of  
222 detection (LOD)) for all regression models.<sup>51</sup>

223

224 Potential confounders were identified *a priori* based on previous literature suggesting an  
225 independent relationship with PFAS levels. We assessed the relationship between each  
226 identified variable and PFAS levels in our data and tested differences between  
227 firefighters and office workers for each potential confounder associated. Variables were

228 included in final regression models if there was a statistically significant association with  
229 PFAS levels in our data and if the variable demonstrated a statistically significant  
230 difference between firefighters and office workers ( $p\text{-value} \leq 0.05$ ) for at least one PFAS  
231 congener.

232

233 We ran linear regression models to test the association between occupation and log-  
234 transformed PFAS concentrations controlling for age, race and ethnicity, and education  
235 (Model 1). A second model controlled for variables in Model 1 as well as consumption  
236 frequency of fish and shellfish, red meat, poultry, fast-food or take-out food, and frozen  
237 food heated in paper or cardboard packaging (Model 2). Exponentiated beta coefficients  
238 estimate the proportional change in the PFAS geometric means associated with being a  
239 firefighter compared to being an office worker and controlling for potential confounders.

240

241 We then limited our analysis to firefighters to evaluate the association between  
242 firefighter practices in the workplace with PFAS levels adjusting for age, race and  
243 ethnicity, and number of years of service with SFFD. Firefighter practices assessed  
244 included use of self-contained breathing apparatus (SCBA) during salvage and  
245 overhaul, use of firefighting foam, and the participants' assigned position (firefighter,  
246 officer, driver). Likewise, because airport fire stations are required to stock, test and use  
247 PFAS-containing firefighting foam due to federal regulations, we included an indicator  
248 variable for those firefighters assigned to San Francisco Airport fire stations.<sup>52</sup> We also  
249 examined the relationship between PFAS concentrations and the frequency of  
250 handwashing during a work shift and showering after a fire event, as well as the

251 relationship with responding to a fire within 24 hours and one year prior to providing a  
252 biospecimen sample. Again, we exponentiated the beta coefficient to obtain the  
253 proportional change in the PFAS geometric means associated with a unit change of  
254 each dependent variable controlling for potential confounders.

255  
256 Lastly, we evaluated how PFAS levels in our study population compared with those  
257 measured in the general U.S. population and in firefighters in Southern California.  
258 Specifically, we plotted the geometric mean (GM) and 95% confidence interval from the  
259 WFBC firefighter and office worker groups and compared them to adult women from the  
260 2013-2014 cycle of the National Health and Nutrition Examination Survey (NHANES)  
261 and the Firefighter Occupational Exposure (FOX) study, in which samples were  
262 collected from a cohort of mostly male firefighters in Southern California between 2010  
263 and 2011.<sup>27,53,54</sup> WFBC firefighter and office worker levels below the LOD were replaced  
264 by the LOD reported for each congener divided by  $\sqrt{2}$  to facilitate comparison of our  
265 results to the FOX and NHANES cohorts, which also used this approach (LOD/ $\sqrt{2}$ ).

266

267 All analyses were performed in R version 3.5.2 and R Studio 1.2.1335.<sup>55,56</sup>

268

## 269 **Results:**

270 176 participants were recruited into the study. Six individuals, (three firefighters and  
271 three office workers) met the study inclusion criteria and were interviewed but did not  
272 provide a blood sample and therefore were excluded from the analysis. Our final study  
273 sample consisted of 86 firefighters and 84 office workers (N=170) (**Table 1**).

**Table 1.** Demographic characteristics of firefighters and office workers in the Women Firefighters Biomonitoring Collaborative (2014-2015)

| <b>Variables: mean ± SD or N(%)</b>        | <b>Firefighters<br/>N=86</b> | <b>Office workers<br/>N=84</b> | <b>P-value<sup>a</sup></b> |
|--------------------------------------------|------------------------------|--------------------------------|----------------------------|
| Age (years)                                | 47.5 (±4.6)                  | 48.3 (±10.5)                   | 0.38                       |
| Years working for SFFD or SF City & County | 17.4 (±4.2)                  | 14.2 (±10.1)                   | 0.0005                     |
| U.S. Born                                  | 77 (89.5%)                   | 62 (73.8%)                     | 0.01                       |
| <b>Race/ethnicity</b>                      |                              |                                |                            |
| NH White                                   | 40 (46.5%)                   | 37 (44.0%)                     | 0.29                       |
| Latina/Hispanic                            | 19 (22.1%)                   | 13 (15.5%)                     |                            |
| NH Asian                                   | 11 (12.8%)                   | 19 (22.6%)                     |                            |
| NH Black                                   | 9 (10.5%)                    | 5 (6.0%)                       |                            |
| NH Other                                   | 7 (8.1%)                     | 10 (11.9%)                     |                            |
| <b>Last grade completed</b>                |                              |                                |                            |
| High school or equivalent                  | 6 (7.0%)                     | 4 (4.8%)                       | < 0.0001                   |
| Some college                               | 42 (48.8%)                   | 11 (13.1%)                     |                            |
| Bachelors                                  | 32 (37.2%)                   | 26 (31.0%)                     |                            |
| Post Graduate                              | 6 (7.0%)                     | 43 (51.2%)                     |                            |
| <b>Marital status</b>                      |                              |                                |                            |
| Married                                    | 37 (43.0%)                   | 47 (56.0%)                     | 0.039                      |
| Widowed                                    | 1 (1.2%)                     | 2 (2.4%)                       |                            |
| Separated/Divorced                         | 26 (30.2%)                   | 11 (13.1%)                     |                            |
| Never married                              | 22 (25.6%)                   | 24 (28.6%)                     |                            |
| <b>Reported yes, ever been pregnant</b>    | 60 (70.6%)                   | 52 (61.9%)                     | 0.26                       |
| <b>Body mass index<sup>b</sup></b>         |                              |                                |                            |
| Healthy weight                             | 33 (40.7%)                   | 43 (52.4%)                     | 0.13                       |
| Overweight                                 | 35 (43.2%)                   | 23 (28.0%)                     |                            |
| Obese                                      | 13 (16.0%)                   | 16 (19.5%)                     |                            |

NH = Non-Hispanic

<sup>a</sup>To account for non-normally distributed variables we used Wilcoxon Rank Sum test to compare continuous variables by firefighter status and the Fisher Test for categorical variables.

<sup>b</sup> CDC guidelines for BMI classification (lb/in<sup>2</sup>): Healthy weight 18.5-24.9; Overweight 25.0-29.9, Obese >30

274

275 Firefighters and office workers had similar demographic characteristics in terms of age,

276 and racial/ethnic make-up, while a significantly higher proportion of office workers were

277 foreign born, married, and had higher levels of educational attainment. Firefighters had

278 an average of seven years of service with the SFFD while office workers had an

279 average of fourteen years of service with the City and County of San Francisco.

280

**Table 2.** Occupational characteristics for WFBC firefighters 2014-15 (N = 86)

| <b>Variables</b>                                                                            | <b>Mean(<math>\pm</math>SD) or N(%)</b> |
|---------------------------------------------------------------------------------------------|-----------------------------------------|
| Frequency of handwashing while at work (times/shift)                                        | 18.8 ( $\pm$ 12.5)                      |
| Frequency of handwashing while not at work (times/day)                                      | 10.3 ( $\pm$ 5.3)                       |
| Reported ever using firefighting foam                                                       | 77 (89.5%)                              |
| Assigned to airport fire station                                                            | 14 (16.3%)                              |
| Response to fire in last 24 hours <sup>a</sup>                                              | 15 (17.4%)                              |
| <b>Number of fires responded to in year prior to sample collection (N = 66)<sup>b</sup></b> |                                         |
| $\leq$ 9                                                                                    | 17 (25.8%)                              |
| 10-15                                                                                       | 17 (25.8%)                              |
| 16-19                                                                                       | 15 (22.7%)                              |
| $\geq$ 20                                                                                   | 17 (25.8%)                              |
| <b>Assignment in the SFFD</b>                                                               |                                         |
| Driver                                                                                      | 21 (24.4%)                              |
| Firefighter                                                                                 | 25 (29.1%)                              |
| Officer                                                                                     | 40 (46.5%)                              |
| <b>Use self-contained breathing apparatus (SCBA) during salvage/overhaul<sup>c</sup></b>    |                                         |
| Always/often                                                                                | 12 (15.0%)                              |
| Sometimes                                                                                   | 14 (17.5%)                              |
| Rarely/never                                                                                | 54 (67.5%)                              |

<sup>a</sup>Includes fire response and training involving live fires; <sup>b</sup>Includes firefighters who consented to give access to SFFD fire history records (n = 66); <sup>c</sup>Six firefighters reported 'do not participate' in salvage/overhaul.

281

282 Occupational activities and characteristics of the firefighter group are shown in **Table 2**.

283 The majority of participants were assigned to the position of firefighter compared to

284 officer or driver positions, and thirteen firefighters were assigned to one of the San

285 Francisco airport fire stations. Most firefighters reported using firefighting foam during

286 their career as a firefighter and over half of participants reported rarely using their SCBA

287 during salvage and overhaul activities after a fire. When asked about recent fires, most

288 firefighters had not responded to a fire or participated in live-fire training in the 24 hours

289 prior to their biospecimen sample collection, while the SFFD fire history data indicated

290 that most firefighters had ten or more fires in the year prior to biospecimen collection.

291

292 **Perfluoroalkyl substance exposures**

293 **Table 3** shows the LOD, detection frequency, GM (95%CI), and percentiles of each  
294 PFAS compound analyzed. Of the twelve PFAS we measured in participants' serum,  
295 four congeners were not detected in any of the study participants (PFBA, PFHxA,  
296 PFHpA, PFOSA). Eight PFAS had measurable levels, seven of which were detected in  
297 at least 70% of study participants and four were detected in 100% of study participants  
298 (PFHxS, PFNA, PFOA, and PFOS). We excluded PFDoA from further analyses since it  
299 was detected in fewer than 25% of study participants. Distributional comparisons of  
300 PFAS levels between WFBC firefighters and office workers for those compounds with  
301 detection frequencies of at least 70% are shown in **Figure S1**. Levels of PFNA, PFHxS  
302 and PFUnDA were statistically significantly higher among the firefighter group compared  
303 to office workers.

304



**Table 3.** Geometric mean (GM) and 95% confidence interval (CI), detection frequency (DF), level of detection (LOD) (ng/mL) and percentiles<sup>a</sup> for each PFAS analyzed in the WFBC cohort.

| Compound Name                 | abbr.  | DF % | LOD  | GM (95% CI)       | Min  | Max   | Percentiles |      |      |       |
|-------------------------------|--------|------|------|-------------------|------|-------|-------------|------|------|-------|
|                               |        |      |      |                   |      |       | 25th        | 50th | 75th | 95th  |
| perfluorohexane sulfonic acid | PFHxS  | 100  | 0.02 | 3.79 (3.24, 4.43) | 0.22 | 90.57 | 1.87        | 3.04 | 6.79 | 22.28 |
| perfluorooctanoic acid        | PFOA   | 100  | 0.02 | 1.15 (1.05, 1.25) | 0.29 | 5.18  | 0.83        | 1.11 | 1.56 | 3.22  |
| perfluorooctane sulfonic acid | PFOS   | 100  | 0.02 | 4.11 (3.68, 4.59) | 0.54 | 81.02 | 2.56        | 4.14 | 6.53 | 12.61 |
| perfluorononanoic acid        | PFNA   | 100  | 0.05 | 0.67 (0.61, 0.74) | 0.15 | 4.49  | 0.42        | 0.64 | 1.03 | 2.2   |
| perfluorodecanoic acid        | PFDA   | 98   | 0.02 | 0.25 (0.23, 0.28) | <LOD | 3.69  | 0.17        | 0.24 | 0.36 | 0.83  |
| perfluoroundecanoic acid      | PFUnDA | 80   | 0.02 | 0.18 (0.14, 0.22) | <LOD | 10.85 | 0.11        | 0.26 | 0.48 | 1.11  |
| perfluorobutane sulfonic acid | PFBuS  | 73   | 0.02 | 0.13 (0.10, 0.16) | <LOD | 1.45  | <LOD        | 0.23 | 0.34 | 0.84  |
| perfluorododecanoic acid      | PBDoA  | 24   | 0.02 | *                 | <LOD | 1.73  | <LOD        | <LOD | <LOD | 0.3   |
| perfluorobutanoic acid        | PFBA   | 0    | 0.05 | *                 | <LOD | <LOD  | <LOD        | <LOD | <LOD | <LOD  |
| perfluorhexanoic acid         | PFHxA  | 0    | 0.02 | *                 | <LOD | <LOD  | <LOD        | <LOD | <LOD | <LOD  |
| perfluorheptanoic acid        | PFHpA  | 0    | 0.02 | *                 | <LOD | <LOD  | <LOD        | <LOD | <LOD | <LOD  |
| perfluorooctane sulfonamide   | PFOSA  | 0    | 0.02 | *                 | <LOD | <LOD  | <LOD        | <LOD | <LOD | <LOD  |

<sup>a</sup>Percentiles and summary statistics calculated using LOD/sqrt2 for those with less than 100% detection frequency.

\*GM and 95%CI not calculated for PFAS with less than 70% DF

305 **Table 4** shows the results from multiple linear regression models assessing the  
306 relationship between log-transformed PFAS concentrations and occupation, comparing  
307 firefighters to office workers (referent) controlling for potential confounders (**Tables S1**  
308 **and S2**). Multiple regression models found higher serum levels of PFHxS, PFUnDA and  
309 PFNA among firefighters compared to office workers in both unadjusted in adjusted  
310 models. PFHxS levels were 2.39 (95%CI = 1.64,3.48) times higher, PFUnDA levels  
311 were 2.32 (95%CI = 1.17, 4.62) times higher and PFNA levels were 1.26 (95% CI =  
312 0.99, 1.59) times higher in firefighters compared to office workers after adjusting for  
313 age, race and ethnicity, educational attainment, as well as the frequency of  
314 consumption of fish/shellfish, red meat, poultry, fast-food, food heated in packaging.

Table 4. Unadjusted and adjusted<sup>a,b</sup> proportional change in geometric mean (95% confidence interval) of PFAS concentrations by firefighter status

| model                                   | $\beta$ Coef | exp $\beta$ (95% CI)                 | p-value |
|-----------------------------------------|--------------|--------------------------------------|---------|
| <b>Perfluorononanoic Acid PFNA</b>      |              |                                      |         |
| unadjusted                              | 0.23         | <b>1.25 (1.03, 1.53)<sup>†</sup></b> | 0.0245  |
| model 1 <sup>a</sup>                    | 0.20         | <b>1.23 (0.98, 1.54)<sup>*</sup></b> | 0.0794  |
| model 2 <sup>b</sup>                    | 0.23         | <b>1.26 (0.99, 1.59)<sup>*</sup></b> | 0.0575  |
| <b>Perfluorooctanoic Acid PFOA</b>      |              |                                      |         |
| unadjusted                              | -0.04        | 0.96 (0.81, 1.13)                    | 0.6070  |
| model 1 <sup>a</sup>                    | 0.03         | 1.03 (0.85, 1.25)                    | 0.7364  |
| model 2 <sup>b</sup>                    | 0.11         | 1.12 (0.91, 1.37)                    | 0.2837  |
| <b>Perfluorooctanoic Sulfonate PFOS</b> |              |                                      |         |
| unadjusted                              | 0.09         | 1.10 (0.88, 1.36)                    | 0.4097  |
| model 1 <sup>a</sup>                    | 0.18         | 1.19 (0.93, 1.53)                    | 0.1621  |
| model 2 <sup>b</sup>                    | 0.12         | 1.13 (0.87, 1.47)                    | 0.3623  |
| <b>Perfluorohexane Sulfonate PFHxS</b>  |              |                                      |         |
| unadjusted                              | 0.43         | <b>1.54 (1.14, 2.07)<sup>†</sup></b> | 0.0051  |
| model 1 <sup>a</sup>                    | 0.67         | <b>1.96 (1.38, 2.78)<sup>†</sup></b> | 0.0002  |
| model 2 <sup>b</sup>                    | 0.87         | <b>2.39 (1.64, 3.48)<sup>‡</sup></b> | 0.0000  |
| <b>Perfluorodecanoic Acid PFDA</b>      |              |                                      |         |
| unadjusted                              | 0.13         | 1.14 (0.92, 1.43)                    | 0.2324  |
| model 1 <sup>a</sup>                    | 0.13         | 1.14 (0.88, 1.49)                    | 0.3183  |
| model 2 <sup>b</sup>                    | 0.16         | 1.18 (0.89, 1.55)                    | 0.2427  |
| <b>Perfluorbutane Sulfonate PFBuS</b>   |              |                                      |         |
| unadjusted                              | 0.17         | 1.19 (0.65, 2.18)                    | 0.5731  |
| model 1 <sup>a</sup>                    | 0.59         | 1.80 (0.87, 3.70)                    | 0.1129  |
| model 2 <sup>b</sup>                    | 0.55         | 1.74 (0.81, 3.75)                    | 0.1580  |
| <b>Perfluoroundecanoic Acid PFUnDA</b>  |              |                                      |         |
| unadjusted                              | 0.55         | <b>1.74 (1.00, 3.02)<sup>†</sup></b> | 0.0496  |
| model 1 <sup>a</sup>                    | 0.77         | <b>2.17 (1.10, 4.25)<sup>†</sup></b> | 0.0245  |
| model 2 <sup>b</sup>                    | 0.84         | <b>2.32 (1.17, 4.62)<sup>†</sup></b> | 0.0162  |

<sup>a</sup> model 1 adjusted for: age, race/ethnicity, and education.

<sup>b</sup> model 2 adjusted for covariates in model 1 and consumption of: fish/shellfish, red meat, poultry, fast-food or take-out food, frozen food heated in paper or cardboard package. Office worker is referent group. \*pvalue $\leq$  0.1; <sup>†</sup>pvalue $\leq$  0.05; <sup>‡</sup>pvalue $\leq$  0.001

315

316 When limiting our analysis to firefighters, we found that assigned firefighter position was

317 associated with higher levels of six of the seven PFAS (**Table 5**). Having the

318 occupational position of firefighter or officer (versus driver) was associated with higher

319 average serum levels of PFNA, PFOA, PFOS, PFDA and PFUnDA, while drivers had  
320 higher average levels of PFBuS compared to those in officer and firefighter positions.  
321 Firefighters assigned to the airport had higher levels of PFNA than those assigned to  
322 other stations in the fire department. Likewise, firefighters who reported using  
323 firefighting foam had elevated PFOA levels compared to those who reported never  
324 using foams.

325  
326 Surprisingly, using SCBA, washing hands during a work shift and showering after a fire  
327 incident were associated with increased levels of some PFAS. Average PFNA and  
328 PFUnDA concentrations were higher among participants who said they sometimes used  
329 their SCBA during salvage/overhaul versus rarely or never. Similarly, average PFHxS  
330 levels were higher among participants who said they washed their hands more  
331 frequently or who responded that they always showered after a fire event compared to  
332 those who washed hands or showered after a fire event the least often. Those who  
333 washed their hands 16-20 times during a work shift had 2.81 (95%CI = 1.56, 5.07) times  
334 higher concentration of PFHxS compared to those who reported washing their hands 10  
335 times or less per shift. Those who reported always showering after a fire event had 2.01  
336 (95% CI = 1.0, 4.03) times higher PFHxS levels compared to those who reported that  
337 they sometimes showered.

Table 5. Adjusted proportional change in geometric mean (GM) and 95% confidence interval (CI) of covariates and serum PFAS concentration among firefighters (N=86) from Maximum Likelihood Regression (MLE) models<sup>a</sup>

| Variable                                                                | n  | PFNA                                | PFOA                                | PFOS                     | PFHxS                               | PFDA                                | PFBuS                               | PFUnDA                              |
|-------------------------------------------------------------------------|----|-------------------------------------|-------------------------------------|--------------------------|-------------------------------------|-------------------------------------|-------------------------------------|-------------------------------------|
| <b>Frequency of SCBA use during salvage/overhaul</b>                    |    |                                     |                                     |                          |                                     |                                     |                                     |                                     |
| Rarely/never                                                            | 54 | <i>Ref</i>                          | <i>Ref</i>                          | <i>Ref</i>               | <i>Ref</i>                          | <i>Ref</i>                          | <i>Ref</i>                          | <i>Ref</i>                          |
| Sometimes                                                               | 14 | <b>1.92 (1.28,2.89)<sup>‡</sup></b> | 1.15 (0.84,1.58)                    | 1.25 (0.86,1.83)         | 0.78 (0.40,1.52)                    | <b>1.47 (1.04,2.07)<sup>†</sup></b> | 0.81 (0.24, 2.67)                   | <b>3.65 (1.44,9.26)<sup>†</sup></b> |
| Always/Often                                                            | 12 | 1.35 (0.91,1.98)                    | 0.98 (0.72,1.32)                    | 0.86 (0.60,1.24)         | 0.61 (0.33,1.15)                    | 1.13 (0.81,1.56)                    | 0.51 (0.16, 1.61)                   | 0.94 (0.39,2.30)                    |
| <b>Ever used firefighting foam</b>                                      |    |                                     |                                     |                          |                                     |                                     |                                     |                                     |
| No                                                                      | 9  | <i>Ref</i>                          | <i>Ref</i>                          | <i>Ref</i>               | <i>Ref</i>                          | <i>Ref</i>                          | <i>Ref</i>                          | <i>Ref</i>                          |
| Yes                                                                     | 77 | 0.86 (0.53,1.38)                    | <b>1.56 (1.09,2.24)<sup>†</sup></b> | 1.19 (0.79,1.81)         | 0.84 (0.39,1.79)                    | 1.18 (0.78,1.80)                    | 0.66 (0.17, 2.52)                   | 0.53 (0.18,1.57)                    |
| <b>Position in the fire department</b>                                  |    |                                     |                                     |                          |                                     |                                     |                                     |                                     |
| Driver                                                                  | 21 | <i>Ref</i>                          | <i>Ref</i>                          | <i>Ref</i>               | <i>Ref</i>                          | <i>Ref</i>                          | <i>Ref</i>                          | <i>Ref</i>                          |
| Firefighter                                                             | 40 | <b>2.10 (1.53,2.88)<sup>‡</sup></b> | <b>1.45 (1.11,1.89)<sup>†</sup></b> | 1.29 (0.95,1.74)*        | 0.91 (0.52,1.60)                    | <b>1.48 (1.10,2.00)<sup>†</sup></b> | 0.63 (0.24, 1.63)                   | 1.93 (0.89,4.20)*                   |
| Officer                                                                 | 25 | <b>1.61 (1.13,2.30)<sup>†</sup></b> | <b>1.37 (1.02,1.84)<sup>†</sup></b> | 1.25 (0.89,1.75)         | 0.99 (0.53,1.84)                    | <b>1.48 (1.06,2.05)<sup>†</sup></b> | <b>0.28(0.10, 0.81)<sup>†</sup></b> | <b>3.35 (1.42,7.90)<sup>†</sup></b> |
| <b>Frequency of hand washing during a 24hr work shift (times/shift)</b> |    |                                     |                                     |                          |                                     |                                     |                                     |                                     |
| ≤10                                                                     | 21 | <i>Ref</i>                          | <i>Ref</i>                          | <i>Ref</i>               | <i>Ref</i>                          | <i>Ref</i>                          | <i>Ref</i>                          | <i>Ref</i>                          |
| 11-15                                                                   | 24 | 0.98 (0.66,1.44)                    | 0.91 (0.67,1.23)                    | 0.90 (0.65,1.26)         | 1.67 (0.93,3.00)*                   | 1.14 (0.81,1.60)                    | 0.71 (0.24, 2.10)                   | 0.54 (0.22,1.33)                    |
| 16-20                                                                   | 20 | 1.09 (0.74,1.61)                    | 0.99 (0.72,1.35)                    | 1.22 (0.87,1.70)         | <b>2.81 (1.56,5.07)<sup>‡</sup></b> | 0.94 (0.67,1.33)                    | 0.67 (0.22, 2.04)                   | 0.72 (0.29,1.76)                    |
| >20                                                                     | 21 | 0.77 (0.52,1.15)                    | 0.98 (0.71,1.34)                    | <b>0.78 (0.55,1.09)*</b> | 1.34 (0.74,2.45)                    | 0.81 (0.58,1.15)                    | 1.93 (0.64, 5.84)                   | 0.70 (0.28,1.75)                    |
| <b>Frequency of washing and/or showering after an incident</b>          |    |                                     |                                     |                          |                                     |                                     |                                     |                                     |
| Sometimes                                                               | 11 | <i>Ref</i>                          | <i>Ref</i>                          | <i>Ref</i>               | <i>Ref</i>                          | <i>Ref</i>                          | <i>Ref</i>                          | <i>Ref</i>                          |
| Always                                                                  | 75 | 0.78 (0.50,1.22)                    | 0.93 (0.66,1.32)                    | 0.89 (0.60,1.31)         | <b>2.01 (1.00,4.03)<sup>†</sup></b> | 1.00 (0.68,1.49)                    | 0.44 (0.13, 1.50)                   | 0.85 (0.31,2.34)                    |

Table 5. Adjusted proportional change in geometric mean (GM) and 95% confidence interval (CI) of covariates and serum PFAS concentration among firefighters (N=86) from Maximum Likelihood Regression (MLE) models<sup>a</sup>

| Variable                                                                      | n  | PFNA                                | PFOA             | PFOS             | PFHxS            | PFDA             | PFBuS             | PFUnDA           |
|-------------------------------------------------------------------------------|----|-------------------------------------|------------------|------------------|------------------|------------------|-------------------|------------------|
| <b>Assigned to the airport fire station</b>                                   |    |                                     |                  |                  |                  |                  |                   |                  |
| No                                                                            | 72 | <i>Ref</i>                          | <i>Ref</i>       | <i>Ref</i>       | <i>Ref</i>       | <i>Ref</i>       | <i>Ref</i>        | <i>Ref</i>       |
| Yes                                                                           | 14 | <b>2.12 (1.50,2.99)<sup>‡</sup></b> | 0.98 (0.73,1.32) | 0.99 (0.71,1.38) | 0.65 (0.36,1.17) | 0.99 (0.71,1.38) | 0.99 (0.71, 1.38) | 1.75 (0.75,4.06) |
| <b>Any fire in 24 hours prior to sample collection</b>                        |    |                                     |                  |                  |                  |                  |                   |                  |
| No                                                                            | 71 | <i>Ref</i>                          | <i>Ref</i>       | <i>Ref</i>       | <i>Ref</i>       | <i>Ref</i>       | <i>Ref</i>        | <i>Ref</i>       |
| Yes                                                                           | 15 | 1.00 (0.69,1.46)                    | 0.91 (0.68,1.22) | 1.14 (0.82,1.57) | 1.41 (0.78,2.55) | 0.85 (0.61,1.18) | 1.31 (0.46, 3.72) | 1.06 (0.45,2.50) |
| <b>Number of fires in the year prior to the sample collection<sup>b</sup></b> |    |                                     |                  |                  |                  |                  |                   |                  |
| ≤9                                                                            | 17 | <i>Ref</i>                          | <i>Ref</i>       | <i>Ref</i>       | <i>Ref</i>       | <i>Ref</i>       | <i>Ref</i>        | <i>Ref</i>       |
| 10-15                                                                         | 17 | 0.85 (0.58,1.24)                    | 0.86 (0.62,1.18) | 1.01 (0.69,1.47) | 1.05 (0.53,2.09) | 1.09 (0.74,1.60) | 1.09 (0.74, 1.60) | 0.53 (0.20,1.44) |
| 16-19                                                                         | 15 | 1.03 (0.67,1.57)                    | 1.13 (0.79,1.62) | 1.19 (0.79,1.80) | 1.39 (0.65,2.98) | 1.12 (0.73,1.72) | 1.12 (0.73, 1.72) | 0.85 (0.29,2.54) |
| ≥20                                                                           | 17 | 0.75 (0.50,1.12)                    | 0.79 (0.56,1.10) | 0.79 (0.53,1.17) | 0.91 (0.44,1.89) | 0.89 (0.59,1.33) | 0.89 (0.59, 1.33) | 0.90 (0.32,2.55) |

<sup>a</sup>Models adjusted for race/ethnicity, age and years of service with SFFD. <sup>b</sup>Data from participants who consented to grant access to their fire history from SFFD; \*pvalue≤ 0.1; †pvalue≤ 0.05; ‡pvalue≤ 0.001

339 Figure 1. Comparison of geometric mean (GM) and 95% confidence intervals (CI) of  
340 PFAS levels measured in WFBC firefighters and office workers (2014-15) with adult  
341 women in NHANES (2013-14) and the FOX study (2010-11).

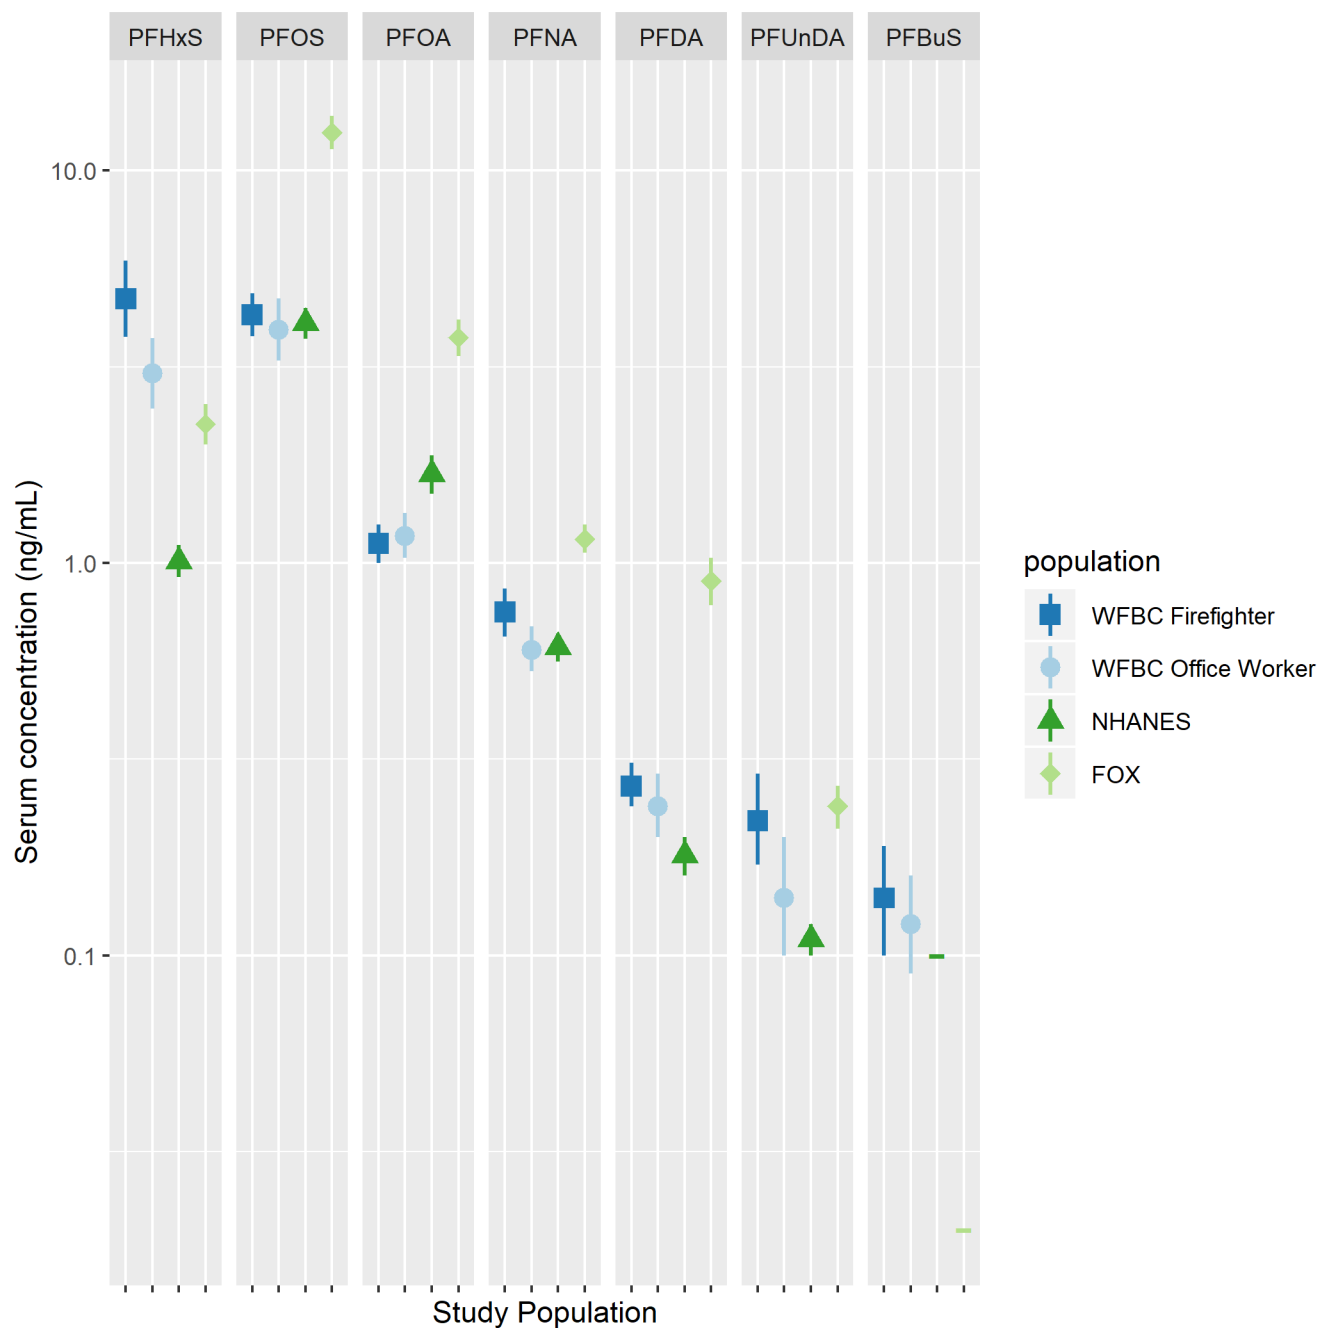

342  
343 Figure footnote: Figure shows GM and 95% CI for those PFAS with detection  
344 frequencies of at least 70% among WFBC participants. PFBuS had low DF for FOX  
345 (6.9%) and NHANES (0.7%); therefore, we plotted the LOD, represented by horizontal  
346 green lines, in lieu of GM and 95% CI. We replaced levels below the LOD with LOD/ $\sqrt{2}$   
347 and applied the LOD respective to each study population. Tests of statistical  
348 significance for differences between WFBC groups is shown in Table 4.  
349

350 **Figure 1** compares PFAS levels measured in our WFBC participants with other cohorts,  
351 including adult women from the 2013-2014 NHANES<sup>54</sup> and the predominantly male  
352 2010-2011 FOX study.<sup>53</sup> WFBC firefighters and office workers had higher serum levels  
353 of PFHxS and a higher detection frequency for PFBuS than both NHANES and FOX;  
354 while PFBuS had low detection frequencies in both the FOX and NHANES studies (DF:  
355 6.9% and 0.7%, respectively) the WFBC had a PFBuS detection frequency of 74% for  
356 firefighters and 70% for office workers. WFBC firefighters also had higher levels of  
357 PFNA, PFDA and PFUnDA levels compared to NHANES, whereas office workers had  
358 similar levels to NHANES for PFOS, PFOA and PFNA. Both WFBC firefighter and office  
359 worker groups had lower levels of PFOS, PFOA, PFNA, PFDA, and PFUnDA than  
360 those measured in the FOX study.

361

## 362 **Discussion:**

363 This biomonitoring study is the first to assess levels of PFAS compounds in an all-  
364 female cohort of firefighters and office workers. Of the twelve PFAS we measured,  
365 detection frequencies ranged from 0 to 100% and all participants had at least four PFAS  
366 congeners (PFHxS, PFOA, PFOS and PFNA) detected in their serum samples.  
367 Widespread use of PFAS in consumer products, contamination of food and water  
368 sources, and their environmental persistence may contribute to the high background  
369 levels of these compounds in both firefighters and office workers. Indeed PFAS are  
370 ubiquitous in the environment and have been found in dust, food and humans  
371 worldwide.<sup>34,57</sup> In addition, the widespread use of PFAS containing products on clothing,  
372 furniture fabrics, carpets and paper food packaging also contributes to levels found in

373 people.<sup>48,58</sup> Drinking water contamination is considered an important source of PFAS  
374 exposure in many communities,<sup>48,59,60</sup> and people with contaminated drinking water  
375 have elevated PFAS in their blood.<sup>61</sup> However, local San Francisco Bay Area water  
376 systems are not likely to be a significant source of PFAS exposure for WFBC study  
377 participants. Municipal water systems in the locations where most study participants live  
378 were tested for PFAS under the Environmental Protection Agency's Unregulated  
379 Contaminant Monitoring Rule in 2016 and tests did not detect measurable PFAS  
380 contamination in San Francisco or surrounding communities' municipal water systems.<sup>62</sup>  
381  
382 Multivariate models showed that PFHxS, PFUnDA, and PFNA exposure was higher in  
383 firefighters compared to office workers after controlling for age, race and ethnicity.  
384 When we additionally controlled for the frequency of eating certain foods the association  
385 remained significantly higher in firefighters compared to office workers and the strength  
386 of association became stronger after adjustment for potential confounders. When we  
387 limited the analysis to firefighters, we found that several occupational activities were  
388 associated with higher PFAS levels. Firefighters' assigned position was the most  
389 strongly associated with higher PFAS levels, with those assigned as firefighters or  
390 officers having higher levels of PFNA, PFOA, PFDA and PFUnDA compared to drivers.  
391 Compared to drivers, PFOS was higher among those assigned to the firefighter position  
392 however, PFBuS was higher among drivers compared to officers. Differential PFAS  
393 exposures by position may be explained by different roles at fire events. Engine drivers  
394 typically remain with the apparatus because they supply water for initial interior fire  
395 suppression work, as well as set the ladders for ventilation procedures. In addition,



396 drivers in SFFD do not typically perform overhaul procedures after a fire is extinguished,  
397 and thus may avoid a critical source of exposure.<sup>63</sup>

398

399 Firefighting foams may be another important source of PFAS exposure. Aqueous Film  
400 Forming Foams (AFFF) are known to contain PFAS surfactants, including PFOS, PFOA  
401 and PFHxS.<sup>19,64</sup> Our data suggest that firefighters who reported using firefighting foam  
402 had higher levels of PFOA than those who reported never using firefighting foams.

403 Among airport firefighters, we found that PFNA levels were two times higher compared  
404 to firefighters assigned to other stations in San Francisco. Although PFNA is not  
405 considered a main ingredient in AFFF, a study in Finland found that firefighters using  
406 AFFF in training activities had increased levels of PFNA after the training activities.<sup>19</sup>

407

408 Unexpectedly, procedures that generally are intended to reduce contaminant exposures  
409 were associated with increased exposures for some PFAS. Washing hands more  
410 frequently during the work shift and always showering after a fire event were associated  
411 with increased PFHxS levels while sometimes using SCBA during salvage overhaul was  
412 associated with increased PFNA, PFDA and PFUnDA. One possible explanation is that  
413 firefighters may be over-reporting their hand washing, showering frequency, and SCBA  
414 use because they know that these activities are expected occupational hygiene  
415 practices. Duration of SCBA use during fire events may also be an important factor to  
416 examine in future studies, as it is possible that although firefighters may wear SCBA  
417 frequently, they may remove it after extinguishing a fire and during salvage and  
418 overhaul operations because gear is heavy, conditions are hot, and the location

419 appears to be free of smoke.<sup>14,63</sup> Self-reporting bias in terms of occupational safety and  
420 health procedures, which has been shown in other studies settings,<sup>65,66</sup> may have also  
421 affected our results. In addition, there may be unknown and unmeasured occupational  
422 sources of PFAS exposure in firefighting that could help explain observed associations.  
423  
424 We compared the levels of PFAS congeners in WFBC participants with levels from two  
425 other exposure studies: A cohort of mostly male firefighters in Southern California (FOX)  
426 and a nationally representative sample of adult women (NHANES). In general, WFBC  
427 firefighters and office workers had lower PFAS levels than those measured in the FOX  
428 study, except for PFHxS which was significantly higher in both WFBC firefighters and  
429 office workers. In particular, the lower levels of PFOA and PFOS in the WFBC  
430 participants may reflect the temporal trends associated with the phase-out of these  
431 compounds in consumer products and firefighting equipment. The FOX study samples  
432 were collected between 2010 and 2011, three years before the start of the WFBC study  
433 and during the phase out period of PFOA and PFOS.<sup>67</sup> Studies have shown that PFAS  
434 levels have changed over time with many PFAS that have been phased out decreasing  
435 and their replacements increasing.<sup>36,37,68,69</sup> Interestingly, we did see overall higher levels  
436 of PFHxS in both groups of WFBC participants collected in 2013-2014 relative to the  
437 2010-2011 FOX cohort. The increased levels in WFBC participants may be due to  
438 PFHxS' long half-life or other continued sources of PFHxS exposures in California  
439 residents.<sup>68</sup> The elevated levels among WFBC firefighters in relation to FOX participants  
440 may be due, in part, to its use as a replacement for PFOA and PFOS in firefighting  
441 foams.<sup>64</sup> Additionally, the lower levels of most PFAS among WFBC participants

442 compared to the mostly male cohort of FOX participants may be further explained by  
443 excretion pathway differences between men and women, where women may have  
444 lower PFAS levels due to excretion during menstruation.<sup>70</sup>

445

446 WFBC and NHANES data were collected at around the same time (2013-14 for  
447 NHANES and 2014-15 for the WFBC) and levels between WFBC and NHANES were  
448 more similar to each other than with the FOX study. However, PFHxS, PFDA, and  
449 PFBuS levels were higher in WFBC firefighters and office workers compared to  
450 NHANES adult women. While we limited the NHANES cohort to adult women, we did  
451 not consider occupation or other factors, including location or other potential exposure  
452 sources.

453

454 Health effects observed in people exposed to PFOA include high cholesterol, ulcerative  
455 colitis, thyroid disease, testicular and kidney cancers, and pregnancy-induced  
456 hypertension.<sup>71</sup> PFOS exposure has also been associated with immunotoxicity, as  
457 indicated by a decreased response to vaccine in children;<sup>72</sup> and other studies of people  
458 exposed to PFAS show effects on liver and decreased birth weight.<sup>73</sup> In animal studies,  
459 PFAS have been shown to have a variety of similar toxicological effects including liver  
460 toxicity, suppressed immune function, altered mammary gland development, obesity,  
461 and cancer.<sup>74,75</sup> The concordance between endpoints identified in animal studies and  
462 human studies, most notably effects on liver, kidney, fetal growth and development, and  
463 suppression of the immune system, add confidence to the findings.<sup>76,77</sup> Based on these  
464 studies in humans and animals, some government agencies have established allowable

465 levels of PFOA and PFOS in drinking water.<sup>76,78</sup> For PFOA, these benchmarks are  
466 designed to prevent people from having blood serum levels above 14 ng/ml.<sup>79</sup> The  
467 maximum value in this study was 5 ng/mL. However, PFOA has been shown to alter  
468 mammary gland development in mice following in utero exposure at even lower levels,  
469 and estimates of target serum levels to protect against those effects are less than 1  
470 ng/ml<sup>79</sup>. The health effects of the other PFAS found in elevated levels in firefighters  
471 have not been well studied and target serum concentrations that are expected to protect  
472 against adverse effects are not available for PFNA, PFBuS, PFHxS, PFUnDA, so it is  
473 difficult to compare measured levels in firefighters with benchmarks intended to protect  
474 against health effects. Allowable daily intake amounts intended to protect against  
475 adverse health effects are in the same range as PFOA for PFNA, while for PFHxS they  
476 are about 10 times higher and for PFBuS they are 100 times higher.<sup>80</sup> However the  
477 higher allowable daily intakes for PFBuS and PFHxS do not necessarily correspond to  
478 higher allowable serum levels for these chemicals. Instead they reflect differences in the  
479 relationship between intake and serum concentration for each of the chemicals.

480

481 We used a community-based participatory research design that entailed the active  
482 involvement of firefighters to recruit participants (both firefighters and office workers)  
483 into the study. By including office workers from the City and County of San Francisco  
484 we were able to compare firefighter exposures to a working population of women who  
485 were not involved in firefighting activities, but who live and work in the same  
486 geographical region allowing us to examine which PFAS chemicals are most strongly  
487 associated with firefighting. Understanding the extent to which PFAS exposures differ

488 between firefighters and office workers can elucidate which compounds are likely to  
489 have occupational sources, highlight opportunities for prevention strategies, and assess  
490 the effectiveness of workplace exposure reduction efforts.

491

#### 492 **Conclusion:**

493 Our study found ubiquitous exposures to multiple PFAS compounds among all  
494 participants of the Women Firefighter Biomonitoring Collaborative. Firefighters were  
495 exposed to higher levels of PFNA, PFHxS and PFUnDA than office workers indicating  
496 potential occupational sources for firefighters. While industrial hygiene practices, use  
497 and access to personal protective equipment, use of AFFF foam, and other  
498 occupational conditions may vary across fire departments and fire events, our results  
499 have relevance for understanding potential sources and pathways of chemical  
500 exposures for other fire departments and regions. Further study is warranted to better  
501 understand exposure patterns and health risks for firefighters associated with these  
502 compounds.

503

#### 504 **References:**

- 505 (1) LeMasters, G. K.; Genaidy, A. M.; Succop, P.; Deddens, J.; Sobeih, T.; Barriera-Viruet, H.;  
506 Dunning, K.; Lockey, J. Cancer Risk among Firefighters: A Review and Meta-Analysis of 32  
507 Studies. *J. Occup. Environ. Med.* **2006**, *48* (11), 1189–1202.  
508 <https://doi.org/10.1097/01.jom.0000246229.68697.90>.
- 509 (2) IARC. *IARC Monographs on the Evaluation of Carcinogenic Risks to Humans Volume 98*  
510 *Painting, Firefighting, and Shiftwork.*; WHO: Lyon, France, 2010.

- 511 (3) Daniels, R. D.; Kubale, T. L.; Yiin, J. H.; Dahm, M. M.; Hales, T. R.; Baris, D.; Zahm, S. H.;  
512 Beaumont, J. J.; Waters, K. M.; Pinkerton, L. E. Mortality and Cancer Incidence in a Pooled  
513 Cohort of US Firefighters from San Francisco, Chicago and Philadelphia (1950-2009).  
514 *Occup. Environ. Med.* **2014**, *71* (6), 388–397. [https://doi.org/10.1136/oemed-2013-](https://doi.org/10.1136/oemed-2013-101662)  
515 [101662](https://doi.org/10.1136/oemed-2013-101662).
- 516 (4) Ahn, Y.-S.; Jeong, K.-S.; Kim, K.-S. Cancer Morbidity of Professional Emergency  
517 Responders in Korea. *Am. J. Ind. Med.* **2012**, *55* (9), 768–778.  
518 <https://doi.org/10.1002/ajim.22068>.
- 519 (5) Bates, M. N. Registry-Based Case-Control Study of Cancer in California Firefighters. *Am. J.*  
520 *Ind. Med.* **2007**, *50* (5), 339–344. <https://doi.org/10.1002/ajim.20446>.
- 521 (6) Delahunt, B.; Bethwaite, P. B.; Nacey, J. N. Occupational Risk for Renal Cell Carcinoma. A  
522 Case-Control Study Based on the New Zealand Cancer Registry. *Br. J. Urol.* **1995**, *75* (5),  
523 578–582. <https://doi.org/10.1111/j.1464-410X.1995.tb07410.x>.
- 524 (7) Kang, D.; Davis, L. K.; Hunt, P.; Kriebel, D. Cancer Incidence among Male Massachusetts  
525 Firefighters, 1987-2003. *Am. J. Ind. Med.* **2008**, *51* (5), 329–335.  
526 <https://doi.org/10.1002/ajim.20549>.
- 527 (8) Ma, F.; Fleming, L. E.; Lee, D. J.; Trapido, E.; Gerace, T. A.; Lai, H.; Lai, S. Mortality in  
528 Florida Professional Firefighters, 1972 to 1999. *Am. J. Ind. Med.* **2005**, *47* (6), 509–517.  
529 <https://doi.org/10.1002/ajim.20160>.
- 530 (9) Ma, F.; Fleming, L. E.; Lee, D. J.; Trapido, E.; Gerace, T. A. Cancer Incidence in Florida  
531 Professional Firefighters, 1981 to 1999. *J. Occup. Environ. Med.* **2006**, *48* (9), 883–888.  
532 <https://doi.org/10.1097/01.jom.0000235862.12518.04>.

- 533 (10) Tsai, R. J.; Luckhaupt, S. E.; Schumacher, P.; Cress, R. D.; Deapen, D. M.; Calvert, G. M.  
534 Risk of Cancer among Firefighters in California, 1988-2007. *Am. J. Ind. Med.* **2015**, *58* (7),  
535 715–729. <https://doi.org/10.1002/ajim.22466>.
- 536 (11) Adetona, O.; Zhang, J. J.; Hall, D. B.; Wang, J.-S.; Vena, J. E.; Naeher, L. P. Occupational  
537 Exposure to Woodsmoke and Oxidative Stress in Wildland Firefighters. *Sci. Total Environ.*  
538 **2013**, *449*, 269–275. <https://doi.org/10.1016/j.scitotenv.2013.01.075>.
- 539 (12) Bolstad-Johnson, D. M.; Burgess, J. L.; Crutchfield, C. D.; Storment, S.; Gerkin, R.; Wilson,  
540 J. R. Characterization of Firefighter Exposures during Fire Overhaul. *AIHAJ J. Sci. Occup.*  
541 *Environ. Health Saf.* **2000**, *61* (5), 636–641.
- 542 (13) Fent, K. W.; Eisenberg, J.; Snawder, J.; Sammons, D.; Pleil, J. D.; Stiegel, M. A.; Mueller, C.;  
543 Horn, G. P.; Dalton, J. Systemic Exposure to PAHs and Benzene in Firefighters Suppressing  
544 Controlled Structure Fires. *Ann. Occup. Hyg.* **2014**, *58* (7), 830–845.  
545 <https://doi.org/10.1093/annhyg/meu036>.
- 546 (14) Gainey, S. J.; Horn, G. P.; Towers, A. E.; Oelschlager, M. L.; Tir, V. L.; Drnevich, J.; Fent, K.  
547 W.; Kerber, S.; Smith, D. L.; Freund, G. G. Exposure to a Firefighting Overhaul  
548 Environment without Respiratory Protection Increases Immune Dysregulation and Lung  
549 Disease Risk. *PloS One* **2018**, *13* (8), e0201830.  
550 <https://doi.org/10.1371/journal.pone.0201830>.
- 551 (15) Navarro, K. M.; Cisneros, R.; Noth, E. M.; Balmes, J. R.; Hammond, S. K. Occupational  
552 Exposure to Polycyclic Aromatic Hydrocarbon of Wildland Firefighters at Prescribed and  
553 Wildland Fires. *Environ. Sci. Technol.* **2017**, *51* (11), 6461–6469.  
554 <https://doi.org/10.1021/acs.est.7b00950>.

- 555 (16) Alexander, B. M.; Baxter, C. S. Flame-Retardant Contamination of Firefighter Personal  
556 Protective Clothing - A Potential Health Risk for Firefighters. *J. Occup. Environ. Hyg.* **2016**,  
557 *13* (9), D148-155. <https://doi.org/10.1080/15459624.2016.1183016>.
- 558 (17) Brown, F. R.; Whitehead, T. P.; Park, J.-S.; Metayer, C.; Petreas, M. X. Levels of Non-  
559 Polybrominated Diphenyl Ether Brominated Flame Retardants in Residential House Dust  
560 Samples and Fire Station Dust Samples in California. *Environ. Res.* **2014**, *135*, 9–14.  
561 <https://doi.org/10.1016/j.envres.2014.08.022>.
- 562 (18) Fent, K. W.; Evans, D. E.; Booher, D.; Pleil, J. D.; Stiegel, M. A.; Horn, G. P.; Dalton, J.  
563 Volatile Organic Compounds Off-Gassing from Firefighters' Personal Protective  
564 Equipment Ensembles after Use. *J. Occup. Environ. Hyg.* **2015**, *12* (6), 404–414.  
565 <https://doi.org/10.1080/15459624.2015.1025135>.
- 566 (19) Laitinen, J. A.; Koponen, J.; Koikkalainen, J.; Kiviranta, H. Firefighters' Exposure to  
567 Perfluoroalkyl Acids and 2-Butoxyethanol Present in Firefighting Foams. *Toxicol. Lett.*  
568 **2014**, *231* (2), 227–232. <https://doi.org/10.1016/j.toxlet.2014.09.007>.
- 569 (20) Shen, B.; Whitehead, T. P.; McNeel, S.; Brown, F. R.; Dhaliwal, J.; Das, R.; Israel, L.; Park,  
570 J.-S.; Petreas, M. High Levels of Polybrominated Diphenyl Ethers in Vacuum Cleaner Dust  
571 from California Fire Stations. *Environ. Sci. Technol.* **2015**, *49* (8), 4988–4994.  
572 <https://doi.org/10.1021/es505463g>.
- 573 (21) Robinson, M. S.; Anthony, T. R.; Littau, S. R.; Herckes, P.; Nelson, X.; Poplin, G. S.; Burgess,  
574 J. L. Occupational PAH Exposures during Prescribed Pile Burns. *Ann. Occup. Hyg.* **2008**, *52*  
575 (6), 497–508. <https://doi.org/10.1093/annhyg/men027>.



- 576 (22) Caux, C.; O'Brien, C.; Viau, C. Determination of Firefighter Exposure to Polycyclic  
577 Aromatic Hydrocarbons and Benzene during Fire Fighting Using Measurement of  
578 Biological Indicators. *Appl. Occup. Environ. Hyg.* **2002**, *17* (5), 379–386.  
579 <https://doi.org/10.1080/10473220252864987>.
- 580 (23) Austin, C. C.; Wang, D.; Ecobichon, D. J.; Dussault, G. Characterization of Volatile Organic  
581 Compounds in Smoke at Experimental Fires. *J. Toxicol. Environ. Health A* **2001**, *63* (3),  
582 191–206. <https://doi.org/10.1080/15287390151101547>.
- 583 (24) Feunekes, F. D.; Jongeneelen, F. J.; vd Laan, H.; Schoonhof, F. H. Uptake of Polycyclic  
584 Aromatic Hydrocarbons among Trainers in a Fire-Fighting Training Facility. *Am. Ind. Hyg.*  
585 *Assoc. J.* **1997**, *58* (1), 23–28. <https://doi.org/10.1080/15428119791013035>.
- 586 (25) Shaw, S. D.; Berger, M. L.; Harris, J. H.; Yun, S. H.; Wu, Q.; Liao, C.; Blum, A.; Stefani, A.;  
587 Kannan, K. Persistent Organic Pollutants Including Polychlorinated and Polybrominated  
588 Dibenzo-p-Dioxins and Dibenzofurans in Firefighters from Northern California.  
589 *Chemosphere* **2013**, *91* (10), 1386–1394.  
590 <https://doi.org/10.1016/j.chemosphere.2012.12.070>.
- 591 (26) Park, J.-S.; Voss, R. W.; McNeel, S.; Wu, N.; Guo, T.; Wang, Y.; Israel, L.; Das, R.; Petreas,  
592 M. High Exposure of California Firefighters to Polybrominated Diphenyl Ethers. *Environ.*  
593 *Sci. Technol.* **2015**, *49* (5), 2948–2958. <https://doi.org/10.1021/es5055918>.
- 594 (27) Dobraca, D.; Israel, L.; McNeel, S.; Voss, R.; Wang, M.; Gajek, R.; Park, J.-S.; Harwani, S.;  
595 Barley, F.; She, J.; et al. Biomonitoring in California Firefighters: Metals and  
596 Perfluorinated Chemicals. *J. Occup. Environ. Med.* **2015**, *57* (1), 88–97.  
597 <https://doi.org/10.1097/JOM.0000000000000307>.

- 598 (28) Jin, C.; Sun, Y.; Islam, A.; Qian, Y.; Ducatman, A. Perfluoroalkyl Acids Including  
599 Perfluorooctane Sulfonate and Perfluorohexane Sulfonate in Firefighters. *J. Occup.*  
600 *Environ. Med.* **2011**, *53* (3), 324–328. <https://doi.org/10.1097/JOM.0b013e31820d1314>.
- 601 (29) Brandt-Rauf, P. W.; Fallon, L. F.; Tarantini, T.; Idema, C.; Andrews, L. Health Hazards of  
602 Fire Fighters: Exposure Assessment. *Br. J. Ind. Med.* **1988**, *45* (9), 606–612.  
603 <https://doi.org/10.1136/oem.45.9.606>.
- 604 (30) Edelman, P.; Osterloh, J.; Pirkle, J.; Caudill, S. P.; Grainger, J.; Jones, R.; Blount, B.; Calafat,  
605 A.; Turner, W.; Feldman, D.; et al. Biomonitoring of Chemical Exposure among New York  
606 City Firefighters Responding to the World Trade Center Fire and Collapse. *Environ. Health*  
607 *Perspect.* **2003**, *111* (16), 1906–1911.
- 608 (31) Rudel, R. A.; Fenton, S. E.; Ackerman, J. M.; Euling, S. Y.; Makris, S. L. Environmental  
609 Exposures and Mammary Gland Development: State of the Science, Public Health  
610 Implications, and Research Recommendations. *Environ. Health Perspect.* **2011**, *119* (8),  
611 1053–1061. <https://doi.org/10.1289/ehp.1002864>.
- 612 (32) Rudel, R. A.; Ackerman, J. M.; Attfield, K. R.; Brody, J. G. New Exposure Biomarkers as  
613 Tools for Breast Cancer Epidemiology, Biomonitoring, and Prevention: A Systematic  
614 Approach Based on Animal Evidence. *Environ. Health Perspect.* **2014**, *122* (9), 881–895.  
615 <https://doi.org/10.1289/ehp.1307455>.
- 616 (33) Moody, C. A.; Field, J. A. Perfluorinated Surfactants and the Environmental Implications  
617 of Their Use in Fire-Fighting Foams. *Environ. Sci. Technol.* **2000**, *34* (18), 3864–3870.  
618 <https://doi.org/10.1021/es991359u>.

- 619 (34) Björklund, J. A.; Thuresson, K.; de Wit, C. A. Perfluoroalkyl Compounds (PFCs) in Indoor  
620 Dust: Concentrations, Human Exposure Estimates, and Sources. *Environ. Sci. Technol.*  
621 **2009**, *43* (7), 2276–2281. <https://doi.org/10.1021/es803201a>.
- 622 (35) Olsen, G. W.; Mair, D. C.; Reagen, W. K.; Ellefson, M. E.; Ehresman, D. J.; Butenhoff, J. L.;  
623 Zobel, L. R. Preliminary Evidence of a Decline in Perfluorooctanesulfonate (PFOS) and  
624 Perfluorooctanoate (PFOA) Concentrations in American Red Cross Blood Donors.  
625 *Chemosphere* **2007**, *68* (1), 105–111.  
626 <https://doi.org/10.1016/j.chemosphere.2006.12.031>.
- 627 (36) Calafat, A. M.; Wong, L.-Y.; Kuklennyik, Z.; Reidy, J. A.; Needham, L. L. Polyfluoroalkyl  
628 Chemicals in the U.S. Population: Data from the National Health and Nutrition  
629 Examination Survey (NHANES) 2003-2004 and Comparisons with NHANES 1999-2000.  
630 *Environ. Health Perspect.* **2007**, *115* (11), 1596–1602.  
631 <https://doi.org/10.1289/ehp.10598>.
- 632 (37) Olsen, G. W.; Mair, D. C.; Lange, C. C.; Harrington, L. M.; Church, T. R.; Goldberg, C. L.;  
633 Herron, R. M.; Hanna, H.; Nobiletti, J. B.; Rios, J. A.; et al. Per- and Polyfluoroalkyl  
634 Substances (PFAS) in American Red Cross Adult Blood Donors, 2000-2015. *Environ. Res.*  
635 **2017**, *157*, 87–95. <https://doi.org/10.1016/j.envres.2017.05.013>.
- 636 (38) Barry, V.; Winqvist, A.; Steenland, K. Perfluorooctanoic Acid (PFOA) Exposures and  
637 Incident Cancers among Adults Living near a Chemical Plant. *Environ. Health Perspect.*  
638 **2013**, *121* (11–12), 1313–1318. <https://doi.org/10.1289/ehp.1306615>.

- 639 (39) Joensen, U. N.; Bossi, R.; Leffers, H.; Jensen, A. A.; Skakkebaek, N. E.; Jørgensen, N. Do  
640 Perfluoroalkyl Compounds Impair Human Semen Quality? *Environ. Health Perspect.* **2009**,  
641 *117* (6), 923–927. <https://doi.org/10.1289/ehp.0800517>.
- 642 (40) Lopez-Espinosa, M.-J.; Mondal, D.; Armstrong, B.; Bloom, M. S.; Fletcher, T. Thyroid  
643 Function and Perfluoroalkyl Acids in Children Living Near a Chemical Plant. *Environ.*  
644 *Health Perspect.* **2012**, *120* (7), 1036–1041. <https://doi.org/10.1289/ehp.1104370>.
- 645 (41) Lopez-Espinosa, M.-J.; Mondal, D.; Armstrong, B. G.; Eskenazi, B.; Fletcher, T.  
646 Perfluoroalkyl Substances, Sex Hormones, and Insulin-like Growth Factor-1 at 6-9 Years  
647 of Age: A Cross-Sectional Analysis within the C8 Health Project. *Environ. Health Perspect.*  
648 **2016**, *124* (8), 1269–1275. <https://doi.org/10.1289/ehp.1509869>.
- 649 (42) Bassler, J.; Ducatman, A.; Elliott, M.; Wen, S.; Wahlang, B.; Barnett, J.; Cave, M. C.  
650 Environmental Perfluoroalkyl Acid Exposures Are Associated with Liver Disease  
651 Characterized by Apoptosis and Altered Serum Adipocytokines. *Environ. Pollut. Barking*  
652 *Essex 1987* **2019**, *247*, 1055–1063. <https://doi.org/10.1016/j.envpol.2019.01.064>.
- 653 (43) Blake, B. E.; Pinney, S. M.; Hines, E. P.; Fenton, S. E.; Ferguson, K. K. Associations between  
654 Longitudinal Serum Perfluoroalkyl Substance (PFAS) Levels and Measures of Thyroid  
655 Hormone, Kidney Function, and Body Mass Index in the Fernald Community Cohort.  
656 *Environ. Pollut. Barking Essex 1987* **2018**, *242* (Pt A), 894–904.  
657 <https://doi.org/10.1016/j.envpol.2018.07.042>.
- 658 (44) Liu, G.; Dhana, K.; Furtado, J. D.; Rood, J.; Zong, G.; Liang, L.; Qi, L.; Bray, G. A.; DeJonge,  
659 L.; Coull, B.; et al. Perfluoroalkyl Substances and Changes in Body Weight and Resting

- 660 Metabolic Rate in Response to Weight-Loss Diets: A Prospective Study. *PLoS Med.* **2018**,  
661 15 (2), e1002502. <https://doi.org/10.1371/journal.pmed.1002502>.
- 662 (45) Steenland, K.; Zhao, L.; Winquist, A.; Parks, C. Ulcerative Colitis and Perfluorooctanoic  
663 Acid (PFOA) in a Highly Exposed Population of Community Residents and Workers in the  
664 Mid-Ohio Valley. *Environ. Health Perspect.* **2013**, 121 (8), 900–905.  
665 <https://doi.org/10.1289/ehp.1206449>.
- 666 (46) US Department of Labor, B. of L. S. Employed persons by detailed occupation, sex, race,  
667 and Hispanic or Latino ethnicity <https://www.bls.gov/cps/cpsaat11.htm> (accessed Mar  
668 19, 2019).
- 669 (47) Hulett, D. M.; Bendick Jr, M.; Thomas, S. Y.; Moccio, F. Enhancing Women’s Inclusion in  
670 Firefighting in the USA. *Int. J. Divers. Organ. Communities Nations* **2008**, 8 (2).
- 671 (48) Boronow, K. E.; Brody, J. G.; Schaider, L. A.; Peaslee, G. F.; Havas, L.; Cohn, B. A. Serum  
672 Concentrations of PFASs and Exposure-Related Behaviors in African American and Non-  
673 Hispanic White Women. *J. Expo. Sci. Environ. Epidemiol.* **2019**, 29 (2), 206–217.  
674 <https://doi.org/10.1038/s41370-018-0109-y>.
- 675 (49) Ji, K.; Kim, S.; Kho, Y.; Paek, D.; Sakong, J.; Ha, J.; Kim, S.; Choi, K. Serum Concentrations of  
676 Major Perfluorinated Compounds among the General Population in Korea: Dietary  
677 Sources and Potential Impact on Thyroid Hormones. *Environ. Int.* **2012**, 45, 78–85.  
678 <https://doi.org/10.1016/j.envint.2012.03.007>.
- 679 (50) Tuck, M. K.; Chan, D. W.; Chia, D.; Godwin, A. K.; Grizzle, W. E.; Krueger, K. E.; Rom, W.;  
680 Sanda, M.; Sorbara, L.; Stass, S.; et al. Standard Operating Procedures for Serum and  
681 Plasma Collection: Early Detection Research Network Consensus Statement Standard

- 682 Operating Procedure Integration Working Group. *J. Proteome Res.* **2009**, *8* (1), 113–117.
- 683 <https://doi.org/10.1021/pr800545q>.
- 684 (51) Helsel, D. R. More than Obvious: Better Methods for Interpreting Nondetect Data.
- 685 *Environ. Sci. Technol.* **2005**, *39* (20), 419A-423A.
- 686 (52) Federal Aviation Administration. CertAlerts for Part 139 Airport Certification – Airports
- 687 [https://www.faa.gov/airports/airport\\_safety/certalerts/](https://www.faa.gov/airports/airport_safety/certalerts/) (accessed Jun 5, 2019).
- 688 (53) Biomonitoring California. Project Results for Firefighter Occupational Exposures (FOX)
- 689 Project | Measuring Chemicals in Californians
- 690 <https://biomonitoring.ca.gov/results/projects/410> (accessed Jul 17, 2018).
- 691 (54) Center for Disease Control. NHANES 2013-2014 Laboratory Data
- 692 <https://wwwn.cdc.gov/nchs/nhanes/search/datapage.aspx?Component=Laboratory&CycleBeginYear=2013> (accessed Aug 2, 2018).
- 693
- 694 (55) RStudio Team. *RStudio: Integrated Development for R*; RStudio Inc.: Boston, MA, 2016.
- 695 (56) R Development Core Team. *R: A Language and Environment for Statistical Computing.*; R
- 696 Foundation for Statistical Computing: Vienna, Austria, 2008.
- 697 (57) Petersen, M. S.; Halling, J.; Jørgensen, N.; Nielsen, F.; Grandjean, P.; Jensen, T. K.; Weihe,
- 698 P. Reproductive Function in a Population of Young Faroese Men with Elevated Exposure
- 699 to Polychlorinated Biphenyls (PCBs) and Perfluorinated Alkylate Substances (PFAS). *Int. J.*
- 700 *Environ. Res. Public. Health* **2018**, *15* (9). <https://doi.org/10.3390/ijerph15091880>.
- 701 (58) Domingo, J. L.; Nadal, M. Per- and Polyfluoroalkyl Substances (PFASs) in Food and Human
- 702 Dietary Intake: A Review of the Recent Scientific Literature. *J. Agric. Food Chem.* **2017**, *65*
- 703 (3), 533–543. <https://doi.org/10.1021/acs.jafc.6b04683>.

- 704 (59) Hu, X. C.; Andrews, D. Q.; Lindstrom, A. B.; Bruton, T. A.; Schaider, L. A.; Grandjean, P.;  
705 Lohmann, R.; Carignan, C. C.; Blum, A.; Balan, S. A.; et al. Detection of Poly- and  
706 Perfluoroalkyl Substances (PFASs) in U.S. Drinking Water Linked to Industrial Sites,  
707 Military Fire Training Areas, and Wastewater Treatment Plants. *Environ. Sci. Technol. Lett.* **2016**, *3* (10), 344–350. <https://doi.org/10.1021/acs.estlett.6b00260>.
- 708
- 709 (60) Hurley, S.; Houtz, E.; Goldberg, D.; Wang, M.; Park, J.-S.; Nelson, D. O.; Reynolds, P.;  
710 Bernstein, L.; Anton-Culver, H.; Horn-Ross, P.; et al. Preliminary Associations between the  
711 Detection of Perfluoroalkyl Acids (PFAAs) in Drinking Water and Serum Concentrations in  
712 a Sample of California Women. *Environ. Sci. Technol. Lett.* **2016**, *3* (7), 264–269.  
713 <https://doi.org/10.1021/acs.estlett.6b00154>.
- 714 (61) New Jersey Drinking Water Quality Institute. *Maximum Contaminant Level*  
715 *Recommendation for Perfluorooctanoic Acid in Drinking Water*; 2015.
- 716 (62) US EPA. Occurrence Data for the Unregulated Contaminant Monitoring Rule  
717 [https://www.epa.gov/dwucmr/occurrence-data-unregulated-contaminant-monitoring-](https://www.epa.gov/dwucmr/occurrence-data-unregulated-contaminant-monitoring-rule)  
718 [rule](https://www.epa.gov/dwucmr/occurrence-data-unregulated-contaminant-monitoring-rule) (accessed Aug 20, 2019).
- 719 (63) Fent, K. W.; Evans, D. E.; Babik, K.; Striley, C.; Bertke, S.; Kerber, S.; Smith, D.; Horn, G. P.  
720 Airborne Contaminants during Controlled Residential Fires. *J. Occup. Environ. Hyg.* **2018**,  
721 *15* (5), 399–412. <https://doi.org/10.1080/15459624.2018.1445260>.
- 722 (64) Rotander, A.; Toms, L.-M. L.; Aylward, L.; Kay, M.; Mueller, J. F. Elevated Levels of PFOS  
723 and PFHxS in Firefighters Exposed to Aqueous Film Forming Foam (AFFF). *Environ. Int.*  
724 **2015**, *82*, 28–34. <https://doi.org/10.1016/j.envint.2015.05.005>.

- 725 (65) Griffin, S. C.; Neitzel, R.; Daniell, W. E.; Seixas, N. S. Indicators of Hearing Protection Use:  
726 Self-Report and Researcher Observation. *J. Occup. Environ. Hyg.* **2009**, *6* (10), 639–647.  
727 <https://doi.org/10.1080/15459620903139060>.
- 728 (66) McCullagh, M. C.; Rosemberg, M.-A. Social Desirability Bias in Self-Reporting of Hearing  
729 Protector Use among Farm Operators. *Ann. Occup. Hyg.* **2015**, *59* (9), 1200–1207.  
730 <https://doi.org/10.1093/annhyg/mev046>.
- 731 (67) Scheringer, M.; Trier, X.; Cousins, I. T.; de Voogt, P.; Fletcher, T.; Wang, Z.; Webster, T. F.  
732 Helsingør Statement on Poly- and Perfluorinated Alkyl Substances (PFASs). *Chemosphere*  
733 **2014**, *114*, 337–339. <https://doi.org/10.1016/j.chemosphere.2014.05.044>.
- 734 (68) Hurley, S.; Goldberg, D.; Wang, M.; Park, J.-S.; Petreas, M.; Bernstein, L.; Anton-Culver,  
735 H.; Nelson, D. O.; Reynolds, P. Time Trends in Per- and Polyfluoroalkyl Substances (PFASs)  
736 in California Women: Declining Serum Levels, 2011-2015. *Environ. Sci. Technol.* **2018**, *52*  
737 (1), 277–287. <https://doi.org/10.1021/acs.est.7b04650>.
- 738 (69) Kato, K.; Calafat, A. M.; Wong, L.-Y.; Wanigatunga, A. A.; Caudill, S. P.; Needham, L. L.  
739 Polyfluoroalkyl Compounds in Pooled Sera from Children Participating in the National  
740 Health and Nutrition Examination Survey 2001- 2002. *Environ. Sci. Technol.* **2009**, *43* (7),  
741 2641–2647.
- 742 (70) Zhang, J.; Huang, Y.; Wang, X.; Lin, K.; Wu, K. Environmental Polychlorinated Biphenyl  
743 Exposure and Breast Cancer Risk: A Meta-Analysis of Observational Studies. *PLoS ONE*  
744 **2015**, *10* (11). <https://doi.org/10.1371/journal.pone.0142513>.
- 745 (71) C8 Science Panel. C8 Science Panel Website <http://www.c8sciencepanel.org/> (accessed  
746 Jul 30, 2019).



- 747 (72) Grandjean, P.; Andersen, E. W.; Budtz-Jørgensen, E.; Nielsen, F.; Mølbak, K.; Weihe, P.;  
748 Heilmann, C. Serum Vaccine Antibody Concentrations in Children Exposed to  
749 Perfluorinated Compounds. *JAMA* **2012**, *307* (4), 391–397.  
750 <https://doi.org/10.1001/jama.2011.2034>.
- 751 (73) Agency for Toxic Substances and Disease Registry (ATSDR). *Toxicological Profile for*  
752 *Perfluoroalkyls. (Draft for Public Comment)*.; Atlanta, GA: U.S. Department of Health and  
753 Human Services, Public Health Service., 2018.
- 754 (74) Lau, C. Perfluorinated Compounds: An Overview. In *Toxicological Effects of Perfluoroalkyl*  
755 *and Polyfluoroalkyl Substances*; DeWitt, J. C., Ed.; Molecular and Integrative Toxicology;  
756 Humana Press, Cham, 2015; pp 1–21. [https://doi.org/10.1007/978-3-319-15518-0\\_1](https://doi.org/10.1007/978-3-319-15518-0_1).
- 757 (75) Post, G. B.; Gleason, J. A.; Cooper, K. R. Key Scientific Issues in Developing Drinking Water  
758 Guidelines for Perfluoroalkyl Acids: Contaminants of Emerging Concern. *PLoS Biol.* **2017**,  
759 *15* (12), e2002855. <https://doi.org/10.1371/journal.pbio.2002855>.
- 760 (76) Cordner, A.; De La Rosa, V. Y.; Schaider, L. A.; Rudel, R. A.; Richter, L.; Brown, P. Guideline  
761 Levels for PFOA and PFOS in Drinking Water: The Role of Scientific Uncertainty, Risk  
762 Assessment Decisions, and Social Factors. *J. Expo. Sci. Environ. Epidemiol.* **2019**, *29* (2),  
763 157–171. <https://doi.org/10.1038/s41370-018-0099-9>.
- 764 (77) DeWitt, J. C.; Blossom, S. J.; Schaider, L. A. Exposure to Per-Fluoroalkyl and  
765 Polyfluoroalkyl Substances Leads to Immunotoxicity: Epidemiological and Toxicological  
766 Evidence. *J. Expo. Sci. Environ. Epidemiol.* **2019**, *29* (2), 148–156.  
767 <https://doi.org/10.1038/s41370-018-0097-y>.

- 768 (78) Interstate Technology and Regulatory Council. *Interstate Technology and Regularotry*  
769 *Council (ITRC) PFAS Regulations, Guidance and Advisories Fact Sheet*; ITRC PFAS  
770 Regulations Section 5 Tables, Ed. 2017; Interstate Technology and Regulatory Council,  
771 2017.
- 772 (79) New Jersey Department of Environmental Protection. *Health-Based Maximum*  
773 *Recommendation Level Support Document: Perfluorooctanoic Acid (PFOA)*; New Jersey  
774 Drinking Water Quality Institute, Heath Effects Sub-committee: Trenton New Jersey,  
775 2015; p 475.
- 776 (80) Michigan Department of Health and Human Services, Division of Environmental Health.  
777 *Public Health Drinking Water Screening Levels for PFAS*; Michigan PFAS Action Response  
778 Team Human Health Workgroup: Michigan, 2019.
- 779
- 780
